# Supplementary material
Source: PubMed Central journal article supplement (PMC6791285)
Supplement: bi9b00296_si_001.pdf [file bi9b00296_si_001.pdf]

**Crystal structures and NMR studies of the apo form of the c-MYC:MAX  
bHLHZip complex reveal a helical basic region in the absence of DNA**

Susan Sammak(a)<sup>§</sup>; Najoua Hamdani(a)<sup>§</sup>; Fabrice Gorrec(b); Mark D. Allen(b);  
Stefan M.V. Freund(b); Mark Bycroft(b); and Giovanna Zinzalla(a)\*

(a) Microbiology, Tumor and Cell Biology (MTC), Karolinska Institutet, Solnavägen 9,  
171 65 Stockholm, Sweden.

(b) MRC Laboratory of Molecular Biology, Cambridge Biomedical Campus, Francis  
Crick Ave, Cambridge CB2 0QH, UK.

**Table S1. The eight mixes of additives (44 compounds) integrated in the final formulation of MORPHEUS III.**

| Mix name                | Solvent        | Chemicals                                                                                                                                                                                                           |
|-------------------------|----------------|---------------------------------------------------------------------------------------------------------------------------------------------------------------------------------------------------------------------|
| Dipeptides              | DW             | 2 %(w/v) Ala-Ala, 2 %(w/v) Ala-Gln, 2 %(w/v) Gly-Glu, 2 %(w/v) Gly-L-Ala, 2 %(w/v) Gly-L-Asp, 2 %(w/v) Gly-Sar, 2 %(w/v) L-carnosine, 2 %(w/v) Leu-Ala hydrate                                                      |
| Vitamins                | DW             | 3 %(w/v) (+)-sodium L-ascorbate, 3 %(w/v) choline chloride, 3 %(w/v) D-panthenol, 3 %(w/v) pyridoxine HCl, 3 %(w/v) thiamine HCl                                                                                    |
| Nucleosides             | DW             | 2 %(w/v) cytidine, 2 %(w/v) inosine, 2 %(w/v) ribavirin, 2 %(w/v) thymidine, 2 %(w/v) uridine                                                                                                                       |
| Phytochemicals 1        | 50 %(v/v) EtOH | 0.5 %(w/v) menthol, 0.5 %(w/v) caffeic acid, 0.5 %(w/v) D-(-)-quinic acid, 0.5 %(w/v) shikimic acid, 0.5 %(w/v) gallic acid monohydrate, 0.5 %(w/v) N-vanillylnonanamide, 0.5 %(w/v) thymol                         |
| Phytochemicals 2        | 50 %(v/v) EtOH | 0.5 %(w/v) D-(-)-salicin, 0.5 %(w/v) esculin hydrate, 0.5 %(w/v) p-arbutin, 0.5 %(w/v) quinine hemisulfate salt monohydrate, 0.5 %(w/v) tryptamin                                                                   |
| Antibiotics             | DW             | 1 %(w/v) ampicillin sodium salt, 1 %(w/v) apramycin sulfate, 1 %(w/v) bacitracin, 1 %(w/v) dihydrostreptomycin sesquisulfate, 1 %(w/v) gentamicin sulfate salt, 1 %(w/v) spectinomycin dihydrochloride pentahydrate |
| Cholic acid derivatives | DW             | 3 %(w/v) CHAPS hydrate, 3 %(w/v) CHAPSO, 3 %(w/v) sodium glycocholate hydrate, 3 %(w/v) taurocholic acid sodium salt hydrate                                                                                        |
| Anesthetic alkaloids    | DW             | 2 %(w/v) lidocaine HCl·H <sub>2</sub> O, 2 %(w/v) procaine HCl, 2 %(w/v) proparacaine HCl, 2 %(w/v) tetracaine HCl                                                                                                  |

*Note some irregularities to the chosen group names, notably ribavirin (a nucleoside derivative) and D-panthenol (provitamin B5).*

**Table S2. The formulation of the 96 crystallization conditions forming MORPHEUS III (in three sections).**

| <b>Well</b> | <b>Cryoprotected precipitant mix</b>                  | <b>Mix of additives</b>       | <b>Buffer system</b>            |
|-------------|-------------------------------------------------------|-------------------------------|---------------------------------|
| <b>A1</b>   | 10% w/v PEG 20 000, 20% v/v PEG MME 500               | 0.2 %(w/v) of each Dipeptide  | 0.1 M MES/imidazole pH 6.5      |
| <b>A2</b>   | 10% w/v PEG 8000, 20% v/v ethylene glycol             | 0.2 %(w/v) of each Dipeptide  | 0.1 M MES/imidazole pH 6.5      |
| <b>A3</b>   | 10% w/v PEG 4000, 20% v/v glycerol                    | 0.2 %(w/v) of each Dipeptide  | 0.1 M MES/imidazole pH 6.5      |
| <b>A4</b>   | 12.5% w/v PEG 1000, 12.5% w/v PEG 3350, 12.5% v/v MPD | 0.2 %(w/v) of each Dipeptide  | 0.1 M MES/imidazole pH 6.5      |
| <b>A5</b>   | 10% w/v PEG 20 000, 20% v/v PEG MME 500               | 0.2 %(w/v) of each Dipeptide  | 0.1 M MOPS/HEPES-Na pH 7.5      |
| <b>A6</b>   | 10% w/v PEG 8000, 20% v/v ethylene glycol             | 0.2 %(w/v) of each Dipeptide  | 0.1 M MOPS/HEPES-Na pH 7.5      |
| <b>A7</b>   | 10% w/v PEG 4000, 20% v/v glycerol                    | 0.2 %(w/v) of each Dipeptide  | 0.1 M MOPS/HEPES-Na pH 7.5      |
| <b>A8</b>   | 12.5% w/v PEG 1000, 12.5% w/v PEG 3350, 12.5% v/v MPD | 0.2 %(w/v) of each Dipeptide  | 0.1 M MOPS/HEPES-Na pH 7.5      |
| <b>A9</b>   | 10% w/v PEG 20 000, 20% v/v PEG MME 500               | 0.2 %(w/v) of each Dipeptide  | 0.1 M bicine/Trizma base pH 8.5 |
| <b>A10</b>  | 10% w/v PEG 8000, 20% v/v ethylene glycol             | 0.2 %(w/v) of each Dipeptide  | 0.1 M bicine/Trizma base pH 8.5 |
| <b>A11</b>  | 10% w/v PEG 4000, 20% v/v glycerol                    | 0.2 %(w/v) of each Dipeptide  | 0.1 M bicine/Trizma base pH 8.5 |
| <b>A12</b>  | 12.5% w/v PEG 1000, 12.5% w/v PEG 3350, 12.5% v/v MPD | 0.2 %(w/v) of each Dipeptide  | 0.1 M bicine/Trizma base pH 8.5 |
| <b>B1</b>   | 10% w/v PEG 20 000, 20% v/v PEG MME 500               | 0.3 %(w/v) of each Vitamin    | 0.1 M MES/imidazole pH 6.5      |
| <b>B2</b>   | 10% w/v PEG 8000, 20% v/v ethylene glycol             | 0.3 %(w/v) of each Vitamin    | 0.1 M MES/imidazole pH 6.5      |
| <b>B3</b>   | 10% w/v PEG 4000, 20% v/v glycerol                    | 0.3 %(w/v) of each Vitamin    | 0.1 M MES/imidazole pH 6.5      |
| <b>B4</b>   | 12.5% w/v PEG 1000, 12.5% w/v PEG 3350, 12.5% v/v MPD | 0.3 %(w/v) of each Vitamin    | 0.1 M MES/imidazole pH 6.5      |
| <b>B5</b>   | 10% w/v PEG 20 000, 20% v/v PEG MME 500               | 0.3 %(w/v) of each Vitamin    | 0.1 M MOPS/HEPES-Na pH 7.5      |
| <b>B6</b>   | 10% w/v PEG 8000, 20% v/v ethylene glycol             | 0.3 %(w/v) of each Vitamin    | 0.1 M MOPS/HEPES-Na pH 7.5      |
| <b>B7</b>   | 10% w/v PEG 4000, 20% v/v glycerol                    | 0.3 %(w/v) of each Vitamin    | 0.1 M MOPS/HEPES-Na pH 7.5      |
| <b>B8</b>   | 12.5% w/v PEG 1000, 12.5% w/v PEG 3350, 12.5% v/v MPD | 0.3 %(w/v) of each Vitamin    | 0.1 M MOPS/HEPES-Na pH 7.5      |
| <b>B9</b>   | 10% w/v PEG 20 000, 20% v/v PEG MME 500               | 0.3 %(w/v) of each Vitamin    | 0.1 M bicine/Trizma base pH 8.5 |
| <b>B10</b>  | 10% w/v PEG 8000, 20% v/v ethylene glycol             | 0.3 %(w/v) of each Vitamin    | 0.1 M bicine/Trizma base pH 8.5 |
| <b>B11</b>  | 10% w/v PEG 4000, 20% v/v glycerol                    | 0.3 %(w/v) of each Vitamin    | 0.1 M bicine/Trizma base pH 8.5 |
| <b>B12</b>  | 12.5% w/v PEG 1000, 12.5% w/v PEG 3350, 12.5% v/v MPD | 0.3 %(w/v) of each Vitamin    | 0.1 M bicine/Trizma base pH 8.5 |
| <b>C1</b>   | 10% w/v PEG 20 000, 20% v/v PEG MME 500               | 0.2 %(w/v) of each Nucleoside | 0.1 M MES/imidazole pH 6.5      |
| <b>C2</b>   | 10% w/v PEG 8000, 20% v/v ethylene glycol             | 0.2 %(w/v) of each Nucleoside | 0.1 M MES/imidazole pH 6.5      |
| <b>C3</b>   | 10% w/v PEG 4000, 20% v/v glycerol                    | 0.2 %(w/v) of each Nucleoside | 0.1 M MES/imidazole pH 6.5      |
| <b>C4</b>   | 12.5% w/v PEG 1000, 12.5% w/v PEG 3350, 12.5% v/v MPD | 0.2 %(w/v) of each Nucleoside | 0.1 M MES/imidazole pH 6.5      |
| <b>C5</b>   | 10% w/v PEG 20 000, 20% v/v PEG MME 500               | 0.2 %(w/v) of each Nucleoside | 0.1 M MOPS/HEPES-Na pH 7.5      |
| <b>C6</b>   | 10% w/v PEG 8000, 20% v/v ethylene glycol             | 0.2 %(w/v) of each Nucleoside | 0.1 M MOPS/HEPES-Na pH 7.5      |
| <b>C7</b>   | 10% w/v PEG 4000, 20% v/v glycerol                    | 0.2 %(w/v) of each Nucleoside | 0.1 M MOPS/HEPES-Na pH 7.5      |

| <b>Well</b> | <b>Cryoprotected precipitant mix</b>                  | <b>Mix of additives</b>             | <b>Buffer system</b>            |
|-------------|-------------------------------------------------------|-------------------------------------|---------------------------------|
| <b>C8</b>   | 12.5% w/v PEG 1000, 12.5% w/v PEG 3350, 12.5% v/v MPD | 0.2 %(w/v) of each Nucleoside       | 0.1 M MOPS/HEPES-Na pH 7.5      |
| <b>C9</b>   | 10% w/v PEG 20 000, 20% v/v PEG MME 500               | 0.2 %(w/v) of each Nucleoside       | 0.1 M bicine/Trizma base pH 8.5 |
| <b>C10</b>  | 10% w/v PEG 8000, 20% v/v ethylene glycol             | 0.2 %(w/v) of each Nucleoside       | 0.1 M bicine/Trizma base pH 8.5 |
| <b>C11</b>  | 10% w/v PEG 4000, 20% v/v glycerol                    | 0.2 %(w/v) of each Nucleoside       | 0.1 M bicine/Trizma base pH 8.5 |
| <b>C12</b>  | 12.5% w/v PEG 1000, 12.5% w/v PEG 3350, 12.5% v/v MPD | 0.2 %(w/v) of each Nucleoside       | 0.1 M bicine/Trizma base pH 8.5 |
| <b>D1</b>   | 10% w/v PEG 20 000, 20% v/v PEG MME 500               | 0.05 %(w/v) of each Phytochemical 1 | 0.1 M MES/imidazole pH 6.5      |
| <b>D2</b>   | 10% w/v PEG 8000, 20% v/v ethylene glycol             | 0.05 %(w/v) of each Phytochemical 1 | 0.1 M MES/imidazole pH 6.5      |
| <b>D3</b>   | 10% w/v PEG 4000, 20% v/v glycerol                    | 0.05 %(w/v) of each Phytochemical 1 | 0.1 M MES/imidazole pH 6.5      |
| <b>D4</b>   | 12.5% w/v PEG 1000, 12.5% w/v PEG 3350, 12.5% v/v MPD | 0.05 %(w/v) of each Phytochemical 1 | 0.1 M MES/imidazole pH 6.5      |
| <b>D5</b>   | 10% w/v PEG 20 000, 20% v/v PEG MME 500               | 0.05 %(w/v) of each Phytochemical 1 | 0.1 M MOPS/HEPES-Na pH 7.5      |
| <b>D6</b>   | 10% w/v PEG 8000, 20% v/v ethylene glycol             | 0.05 %(w/v) of each Phytochemical 1 | 0.1 M MOPS/HEPES-Na pH 7.5      |
| <b>D7</b>   | 10% w/v PEG 4000, 20% v/v glycerol                    | 0.05 %(w/v) of each Phytochemical 1 | 0.1 M MOPS/HEPES-Na pH 7.5      |
| <b>D8</b>   | 12.5% w/v PEG 1000, 12.5% w/v PEG 3350, 12.5% v/v MPD | 0.05 %(w/v) of each Phytochemical 1 | 0.1 M MOPS/HEPES-Na pH 7.5      |
| <b>D9</b>   | 10% w/v PEG 20 000, 20% v/v PEG MME 500               | 0.05 %(w/v) of each Phytochemical 1 | 0.1 M bicine/Trizma base pH 8.5 |
| <b>D10</b>  | 10% w/v PEG 8000, 20% v/v ethylene glycol             | 0.05 %(w/v) of each Phytochemical 1 | 0.1 M bicine/Trizma base pH 8.5 |
| <b>D11</b>  | 10% w/v PEG 4000, 20% v/v glycerol                    | 0.05 %(w/v) of each Phytochemical 1 | 0.1 M bicine/Trizma base pH 8.5 |
| <b>D12</b>  | 12.5% w/v PEG 1000, 12.5% w/v PEG 3350, 12.5% v/v MPD | 0.05 %(w/v) of each Phytochemical 1 | 0.1 M bicine/Trizma base pH 8.5 |
| <b>E1</b>   | 10% w/v PEG 20 000, 20% v/v PEG MME 500               | 0.05 %(w/v) of each Phytochemical 2 | 0.1 M MES/imidazole pH 6.5      |
| <b>E2</b>   | 10% w/v PEG 8000, 20% v/v ethylene glycol             | 0.05 %(w/v) of each Phytochemical 2 | 0.1 M MES/imidazole pH 6.5      |
| <b>E3</b>   | 10% w/v PEG 4000, 20% v/v glycerol                    | 0.05 %(w/v) of each Phytochemical 2 | 0.1 M MES/imidazole pH 6.5      |
| <b>E4</b>   | 12.5% w/v PEG 1000, 12.5% w/v PEG 3350, 12.5% v/v MPD | 0.05 %(w/v) of each Phytochemical 2 | 0.1 M MES/imidazole pH 6.5      |
| <b>E5</b>   | 10% w/v PEG 20 000, 20% v/v PEG MME 500               | 0.05 %(w/v) of each Phytochemical 2 | 0.1 M MOPS/HEPES-Na pH 7.5      |
| <b>E6</b>   | 10% w/v PEG 8000, 20% v/v ethylene glycol             | 0.05 %(w/v) of each Phytochemical 2 | 0.1 M MOPS/HEPES-Na pH 7.5      |
| <b>E7</b>   | 10% w/v PEG 4000, 20% v/v glycerol                    | 0.05 %(w/v) of each Phytochemical 2 | 0.1 M MOPS/HEPES-Na pH 7.5      |
| <b>E8</b>   | 12.5% w/v PEG 1000, 12.5% w/v PEG 3350, 12.5% v/v MPD | 0.05 %(w/v) of each Phytochemical 2 | 0.1 M MOPS/HEPES-Na pH 7.5      |
| <b>E9</b>   | 10% w/v PEG 20 000, 20% v/v PEG MME 500               | 0.05 %(w/v) of each Phytochemical 2 | 0.1 M bicine/Trizma base pH 8.5 |
| <b>E10</b>  | 10% w/v PEG 8000, 20% v/v ethylene glycol             | 0.05 %(w/v) of each Phytochemical 2 | 0.1 M bicine/Trizma base pH 8.5 |
| <b>E11</b>  | 10% w/v PEG 4000, 20% v/v glycerol                    | 0.05 %(w/v) of each Phytochemical 2 | 0.1 M bicine/Trizma base pH 8.5 |
| <b>E12</b>  | 12.5% w/v PEG 1000, 12.5% w/v PEG 3350, 12.5% v/v MPD | 0.05 %(w/v) of each Phytochemical 2 | 0.1 M bicine/Trizma base pH 8.5 |
| <b>F1</b>   | 10% w/v PEG 20 000, 20% v/v PEG MME 500               | 0.1 %(w/v) of each Antibiotic       | 0.1 M MES/imidazole pH 6.5      |
| <b>F2</b>   | 10% w/v PEG 8000, 20% v/v ethylene glycol             | 0.1 %(w/v) of each Antibiotic       | 0.1 M MES/imidazole pH 6.5      |
| <b>F3</b>   | 10% w/v PEG 4000, 20% v/v glycerol                    | 0.1 %(w/v) of each Antibiotic       | 0.1 M MES/imidazole pH 6.5      |
| <b>F4</b>   | 12.5% w/v PEG 1000, 12.5% w/v PEG 3350, 12.5% v/v MPD | 0.1 %(w/v) of each Antibiotic       | 0.1 M MES/imidazole pH 6.5      |

| <b>Well</b> | <b>Cryoprotected precipitant mix</b>                  | <b>Mix of additives</b>                    | <b>Buffer system</b>            |
|-------------|-------------------------------------------------------|--------------------------------------------|---------------------------------|
| <b>F5</b>   | 10% w/v PEG 20 000, 20% v/v PEG MME 500               | 0.1 %(w/v) of each Antibiotic              | 0.1 M MOPS/HEPES-Na pH 7.5      |
| <b>F6</b>   | 10% w/v PEG 8000, 20% v/v ethylene glycol             | 0.1 %(w/v) of each Antibiotic              | 0.1 M MOPS/HEPES-Na pH 7.5      |
| <b>F7</b>   | 10% w/v PEG 4000, 20% v/v glycerol                    | 0.1 %(w/v) of each Antibiotic              | 0.1 M MOPS/HEPES-Na pH 7.5      |
| <b>F8</b>   | 12.5% w/v PEG 1000, 12.5% w/v PEG 3350, 12.5% v/v MPD | 0.1 %(w/v) of each Antibiotic              | 0.1 M MOPS/HEPES-Na pH 7.5      |
| <b>F9</b>   | 10% w/v PEG 20 000, 20% v/v PEG MME 500               | 0.1 %(w/v) of each Antibiotic              | 0.1 M bicine/Trizma base pH 8.5 |
| <b>F10</b>  | 10% w/v PEG 8000, 20% v/v ethylene glycol             | 0.1 %(w/v) of each Antibiotic              | 0.1 M bicine/Trizma base pH 8.5 |
| <b>F11</b>  | 10% w/v PEG 4000, 20% v/v glycerol                    | 0.1 %(w/v) of each Antibiotic              | 0.1 M bicine/Trizma base pH 8.5 |
| <b>F12</b>  | 12.5% w/v PEG 1000, 12.5% w/v PEG 3350, 12.5% v/v MPD | 0.1 %(w/v) of each Antibiotic              | 0.1 M bicine/Trizma base pH 8.5 |
| <b>G1</b>   | 10% w/v PEG 20 000, 20% v/v PEG MME 500               | 0.3 %(w/v) of each Cholic acid derivatives | 0.1 M MES/imidazole pH 6.5      |
| <b>G2</b>   | 10% w/v PEG 8000, 20% v/v ethylene glycol             | 0.3 %(w/v) of each Cholic acid derivatives | 0.1 M MES/imidazole pH 6.5      |
| <b>G3</b>   | 10% w/v PEG 4000, 20% v/v glycerol                    | 0.3 %(w/v) of each Cholic acid derivatives | 0.1 M MES/imidazole pH 6.5      |
| <b>G4</b>   | 12.5% w/v PEG 1000, 12.5% w/v PEG 3350, 12.5% v/v MPD | 0.3 %(w/v) of each Cholic acid derivatives | 0.1 M MES/imidazole pH 6.5      |
| <b>G5</b>   | 10% w/v PEG 20 000, 20% v/v PEG MME 500               | 0.3 %(w/v) of each Cholic acid derivatives | 0.1 M MOPS/HEPES-Na pH 7.5      |
| <b>G6</b>   | 10% w/v PEG 8000, 20% v/v ethylene glycol             | 0.3 %(w/v) of each Cholic acid derivatives | 0.1 M MOPS/HEPES-Na pH 7.5      |
| <b>G7</b>   | 10% w/v PEG 4000, 20% v/v glycerol                    | 0.3 %(w/v) of each Cholic acid derivatives | 0.1 M MOPS/HEPES-Na pH 7.5      |
| <b>G8</b>   | 12.5% w/v PEG 1000, 12.5% w/v PEG 3350, 12.5% v/v MPD | 0.3 %(w/v) of each Cholic acid derivatives | 0.1 M MOPS/HEPES-Na pH 7.5      |
| <b>G9</b>   | 10% w/v PEG 20 000, 20% v/v PEG MME 500               | 0.3 %(w/v) of each Cholic acid derivatives | 0.1 M bicine/Trizma base pH 8.5 |
| <b>G10</b>  | 10% w/v PEG 8000, 20% v/v ethylene glycol             | 0.3 %(w/v) of each Cholic acid derivatives | 0.1 M bicine/Trizma base pH 8.5 |
| <b>G11</b>  | 10% w/v PEG 4000, 20% v/v glycerol                    | 0.3 %(w/v) of each Cholic acid derivatives | 0.1 M bicine/Trizma base pH 8.5 |
| <b>G12</b>  | 12.5% w/v PEG 1000, 12.5% w/v PEG 3350, 12.5% v/v MPD | 0.3 %(w/v) of each Cholic acid derivatives | 0.1 M bicine/Trizma base pH 8.5 |
| <b>H1</b>   | 10% w/v PEG 20 000, 20% v/v PEG MME 500               | 0.2 %(w/v) of each Anesthetic alkaloids    | 0.1 M MES/imidazole pH 6.5      |
| <b>H2</b>   | 10% w/v PEG 8000, 20% v/v ethylene glycol             | 0.2 %(w/v) of each Anesthetic alkaloids    | 0.1 M MES/imidazole pH 6.5      |
| <b>H3</b>   | 10% w/v PEG 4000, 20% v/v glycerol                    | 0.2 %(w/v) of each Anesthetic alkaloids    | 0.1 M MES/imidazole pH 6.5      |
| <b>H4</b>   | 12.5% w/v PEG 1000, 12.5% w/v PEG 3350, 12.5% v/v MPD | 0.2 %(w/v) of each Anesthetic alkaloids    | 0.1 M MES/imidazole pH 6.5      |
| <b>H5</b>   | 10% w/v PEG 20 000, 20% v/v PEG MME 500               | 0.2 %(w/v) of each Anesthetic alkaloids    | 0.1 M MOPS/HEPES-Na pH 7.5      |
| <b>H6</b>   | 10% w/v PEG 8000, 20% v/v ethylene glycol             | 0.2 %(w/v) of each Anesthetic alkaloids    | 0.1 M MOPS/HEPES-Na pH 7.5      |
| <b>H7</b>   | 10% w/v PEG 4000, 20% v/v glycerol                    | 0.2 %(w/v) of each Anesthetic alkaloids    | 0.1 M MOPS/HEPES-Na pH 7.5      |
| <b>H8</b>   | 12.5% w/v PEG 1000, 12.5% w/v PEG 3350, 12.5% v/v MPD | 0.2 %(w/v) of each Anesthetic alkaloids    | 0.1 M MOPS/HEPES-Na pH 7.5      |
| <b>H9</b>   | 10% w/v PEG 20 000, 20% v/v PEG MME 500               | 0.2 %(w/v) of each Anesthetic alkaloids    | 0.1 M bicine/Trizma base pH 8.5 |
| <b>H10</b>  | 10% w/v PEG 8000, 20% v/v ethylene glycol             | 0.2 %(w/v) of each Anesthetic alkaloids    | 0.1 M bicine/Trizma base pH 8.5 |
| <b>H11</b>  | 10% w/v PEG 4000, 20% v/v glycerol                    | 0.2 %(w/v) of each Anesthetic alkaloids    | 0.1 M bicine/Trizma base pH 8.5 |
| <b>H12</b>  | 12.5% w/v PEG 1000, 12.5% w/v PEG 3350, 12.5% v/v MPD | 0.2 %(w/v) of each Anesthetic alkaloids    | 0.1 M bicine/Trizma base pH 8.5 |

**Table S3. Data collection and refinement statistics.**

| Data set                                                                                                                                                                                                                                                                                                                                                                                                                                                                                                                                                                                                                                                                                                                                                                                                                                                                                                                                                                                                                                | Native (collect5)                                                                 | Native (collect2)                         | Native (collect7)                                                                 |
|-----------------------------------------------------------------------------------------------------------------------------------------------------------------------------------------------------------------------------------------------------------------------------------------------------------------------------------------------------------------------------------------------------------------------------------------------------------------------------------------------------------------------------------------------------------------------------------------------------------------------------------------------------------------------------------------------------------------------------------------------------------------------------------------------------------------------------------------------------------------------------------------------------------------------------------------------------------------------------------------------------------------------------------------|-----------------------------------------------------------------------------------|-------------------------------------------|-----------------------------------------------------------------------------------|
| Symmetry                                                                                                                                                                                                                                                                                                                                                                                                                                                                                                                                                                                                                                                                                                                                                                                                                                                                                                                                                                                                                                | P1                                                                                | P2 <sub>1</sub> 2 <sub>1</sub> 2          | P1                                                                                |
| Wavelength                                                                                                                                                                                                                                                                                                                                                                                                                                                                                                                                                                                                                                                                                                                                                                                                                                                                                                                                                                                                                              | 0.9795                                                                            | 0.9763                                    | 0.9795                                                                            |
| Resolution Range (Å)                                                                                                                                                                                                                                                                                                                                                                                                                                                                                                                                                                                                                                                                                                                                                                                                                                                                                                                                                                                                                    | 38.27-1.35                                                                        | 51.93-2.25                                | 72.54-2.20                                                                        |
| Highest resolution shell (Å)                                                                                                                                                                                                                                                                                                                                                                                                                                                                                                                                                                                                                                                                                                                                                                                                                                                                                                                                                                                                            | 1.42-1.35                                                                         | 2.37–2.25                                 | 2.32-2.20                                                                         |
| Unique reflections                                                                                                                                                                                                                                                                                                                                                                                                                                                                                                                                                                                                                                                                                                                                                                                                                                                                                                                                                                                                                      | 80704                                                                             | 25627                                     | 41701                                                                             |
| Completeness (%) <sup>a</sup>                                                                                                                                                                                                                                                                                                                                                                                                                                                                                                                                                                                                                                                                                                                                                                                                                                                                                                                                                                                                           | 87.9 (81.3)                                                                       | 99.7 (99.7)                               | 80.7 (83.3)                                                                       |
| Rmerge <sup>b</sup>                                                                                                                                                                                                                                                                                                                                                                                                                                                                                                                                                                                                                                                                                                                                                                                                                                                                                                                                                                                                                     | 0.062 (0.438)                                                                     | 0.098 (0.545)                             | 0.088 (0.443)                                                                     |
| CC(½) <sup>c</sup>                                                                                                                                                                                                                                                                                                                                                                                                                                                                                                                                                                                                                                                                                                                                                                                                                                                                                                                                                                                                                      | 0.989 (0.748)                                                                     | 0.997 (0.875)                             | 0.995 (0.820)                                                                     |
| Multiplicity <sup>d</sup>                                                                                                                                                                                                                                                                                                                                                                                                                                                                                                                                                                                                                                                                                                                                                                                                                                                                                                                                                                                                               | 2.4 (2.3)                                                                         | 4.8 (4.9)                                 | 2.3 (2.3)                                                                         |
| I/σ <sup>a</sup>                                                                                                                                                                                                                                                                                                                                                                                                                                                                                                                                                                                                                                                                                                                                                                                                                                                                                                                                                                                                                        | 8.7 (2.1)                                                                         | 8.9 (2.8)                                 | 6.7 (1.9)                                                                         |
| Unit cell parameters                                                                                                                                                                                                                                                                                                                                                                                                                                                                                                                                                                                                                                                                                                                                                                                                                                                                                                                                                                                                                    | a = 30.40 Å, b = 52.31 Å,<br>c = 73.09 Å, α = 93.89°,<br>β = 101.92°, γ = 106.79° | a = 74.32 Å, b = 145.18 Å,<br>c = 48.50 Å | a = 48.68 Å, b = 74.33 Å,<br>c = 80.06 Å, α = 107.12°,<br>β = 107.67°, γ = 90.05° |
| <b>Model Refinement</b>                                                                                                                                                                                                                                                                                                                                                                                                                                                                                                                                                                                                                                                                                                                                                                                                                                                                                                                                                                                                                 |                                                                                   |                                           |                                                                                   |
| Resolution Range (Å)                                                                                                                                                                                                                                                                                                                                                                                                                                                                                                                                                                                                                                                                                                                                                                                                                                                                                                                                                                                                                    | 38.27-1.35                                                                        | 40.55-2.25                                | 46.16-2.20                                                                        |
| Highest resolution bin (Å)                                                                                                                                                                                                                                                                                                                                                                                                                                                                                                                                                                                                                                                                                                                                                                                                                                                                                                                                                                                                              | 1.40-1.35                                                                         | 2.34-2.25                                 | 2.28-2.20                                                                         |
| No. of residues:                                                                                                                                                                                                                                                                                                                                                                                                                                                                                                                                                                                                                                                                                                                                                                                                                                                                                                                                                                                                                        | A: 89<br>B: 76<br>C: 88<br>D: 76                                                  | A: 80<br>B: 73<br>C: 78<br>D: 70          | A: 78, B: 68<br>A: 78, B: 68<br>E: 78, F: 71<br>G: 77, H: 67                      |
| No. of water, ligands                                                                                                                                                                                                                                                                                                                                                                                                                                                                                                                                                                                                                                                                                                                                                                                                                                                                                                                                                                                                                   | 359, 2 Cl                                                                         | 180, 6 SO <sub>4</sub>                    | 480, 14 SO <sub>4</sub>                                                           |
| Rwork/Rfree (%) <sup>e</sup>                                                                                                                                                                                                                                                                                                                                                                                                                                                                                                                                                                                                                                                                                                                                                                                                                                                                                                                                                                                                            | 17.28 / 20.26                                                                     | 20.54 / 23.62                             | 21.49 / 26.81                                                                     |
| B average <sup>f</sup> - protein                                                                                                                                                                                                                                                                                                                                                                                                                                                                                                                                                                                                                                                                                                                                                                                                                                                                                                                                                                                                        | 32.07                                                                             | 44.67                                     | 38.63                                                                             |
| - solvent                                                                                                                                                                                                                                                                                                                                                                                                                                                                                                                                                                                                                                                                                                                                                                                                                                                                                                                                                                                                                               | 40.62                                                                             | 46.42                                     | 44.34                                                                             |
| Geometry bond, angles <sup>g</sup>                                                                                                                                                                                                                                                                                                                                                                                                                                                                                                                                                                                                                                                                                                                                                                                                                                                                                                                                                                                                      | 0.005, 0.756                                                                      | 0.006, 0.677                              | 0.003, 0.510                                                                      |
| Molprobit clashscore                                                                                                                                                                                                                                                                                                                                                                                                                                                                                                                                                                                                                                                                                                                                                                                                                                                                                                                                                                                                                    | 8.84                                                                              | 6.17                                      | 7.79                                                                              |
| Ramachandran <sup>h</sup>                                                                                                                                                                                                                                                                                                                                                                                                                                                                                                                                                                                                                                                                                                                                                                                                                                                                                                                                                                                                               | 99.38, 0.0                                                                        | 98.29, 0.0                                | 99.13, 0.52                                                                       |
| PDB ID <sup>i</sup>                                                                                                                                                                                                                                                                                                                                                                                                                                                                                                                                                                                                                                                                                                                                                                                                                                                                                                                                                                                                                     | 6G6K                                                                              | 6G6J                                      | 6G6L                                                                              |
| <p><sup>a</sup> Signal to noise ratio of intensities, highest resolution bin in brackets. <sup>b</sup> <math>R_m = \frac{\sum h \sum i  I(h,i) - \langle I(h) \rangle }{\sum h \sum i I(h,i)}</math> where <math>I(h,i)</math> are symmetry-related intensities and <math>\langle I(h) \rangle</math> is the mean intensity of the reflection with unique index <math>h</math>. <sup>c</sup> CC<sub>1/2</sub> is the correlation coefficient of the mean intensities between two random half-datasets. Multiplicity for unique reflections. <sup>e</sup> 5% of reflections were randomly selected for determination of the free R factor, prior to any refinement. <sup>f</sup> Temperature factors averaged for all atoms. <sup>g</sup> RMS deviations from ideal geometry for bond lengths and restraint angles (Engh and Huber). <sup>h</sup> Percentage of residues in the 'most favoured region' of the Ramachandran plot and percentage of outliers (MOLPROBITY). <sup>i</sup> Protein Data Bank identifiers for coordinates.</p> |                                                                                   |                                           |                                                                                   |
| <p><b>Crystallography conditions:</b> Collect 5; 10% PEG 8000, 20% ethylene glycol, 5 % EtOH, 0.1 M MOPS/HEPES-Na pH 7.5. 0.075 % (w/v) of each Additive [Additive: 0.75 % menthol, 0.75 % caffeic acid, 0.75 % D-quinic acid, 0.75 % shikimic acid, 0.75 % gallic acid monohydrate, 0.75 % N-vanillynonanamide]. Collect 2; 20% PEG 3350, 0.2M sodium sulfate decahydrate, pH 7, (20% glycerol was used as cryo-protectant). Collect 7; 15% PEG 8000 15, 0.2M ammonium sulfate, pH 7, (20% glycerol was used as cryo-protectant).</p>                                                                                                                                                                                                                                                                                                                                                                                                                                                                                                  |                                                                                   |                                           |                                                                                   |

|              | Basic | H1 | Loop     |
|--------------|-------|----|----------|
| <b>c-MYC</b> | NV    | RS | LENNEKAP |
| <b>v-MYC</b> | ND    | LR | VANNEKAP |

  

|              | H2          | Leucine Zipper                     |
|--------------|-------------|------------------------------------|
| <b>c-MYC</b> | KVVILKKATAY | ILSVQAEQKLISEEDLLRKRREQLKHKLEQLRNS |
| <b>v-MYC</b> | KVVILKKATEY | VLSLQSDHKLIAEKEQLRRREQLKHNLEQLRNS  |

**Figure S1. Amino acid sequence alignment for c-MYC and v-MYC bHLHZip proteins.**

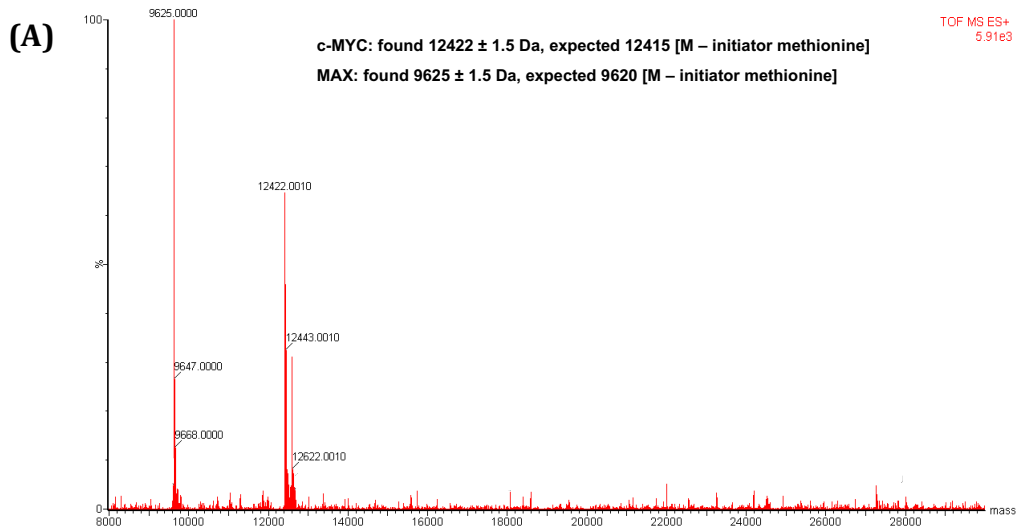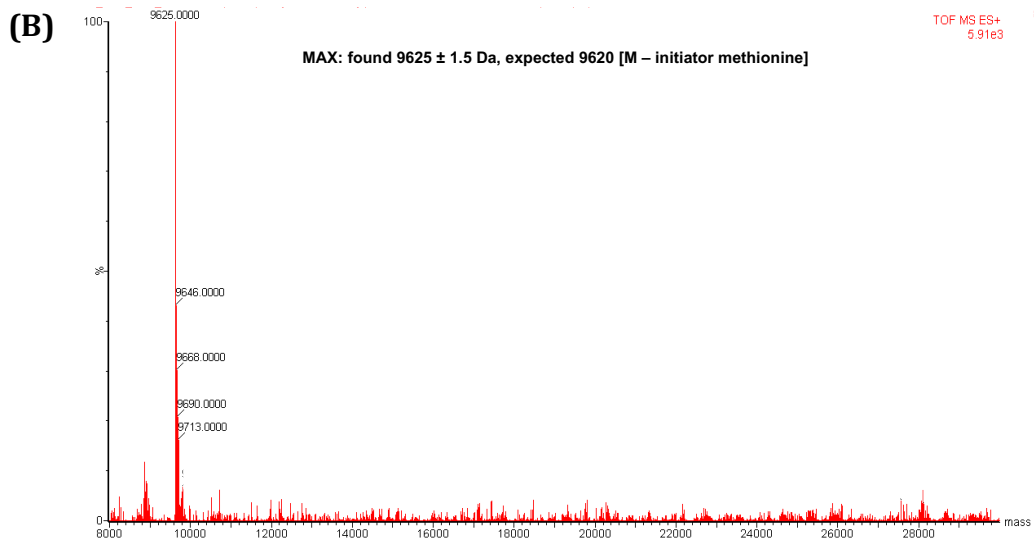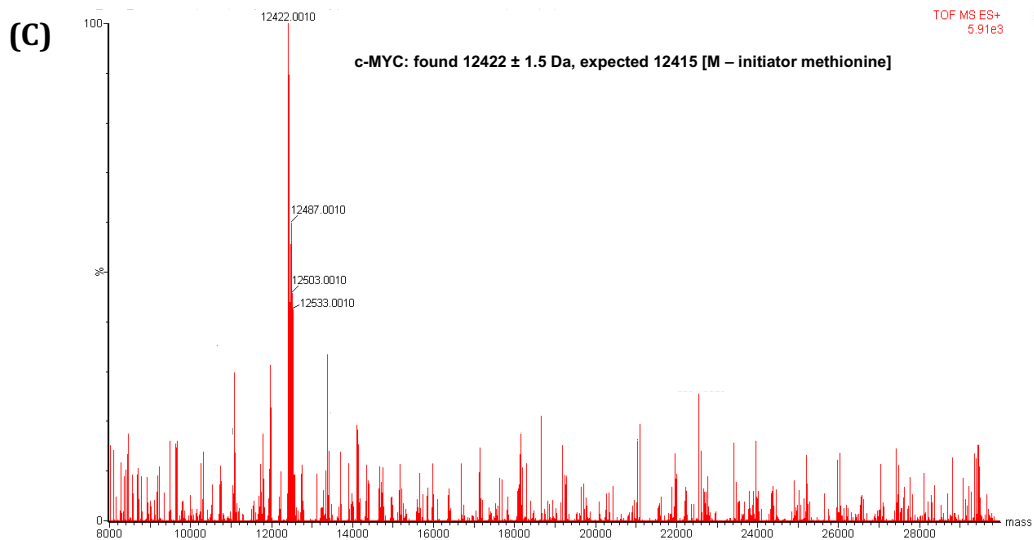

**Figure S2. TOF ES+ Mass spectrometry for (A) His-c-MYC:MAX bHLHZip, (B) MAX:MAX bHLHZip, (C) His-c-MYC bHLHZip free protein.**





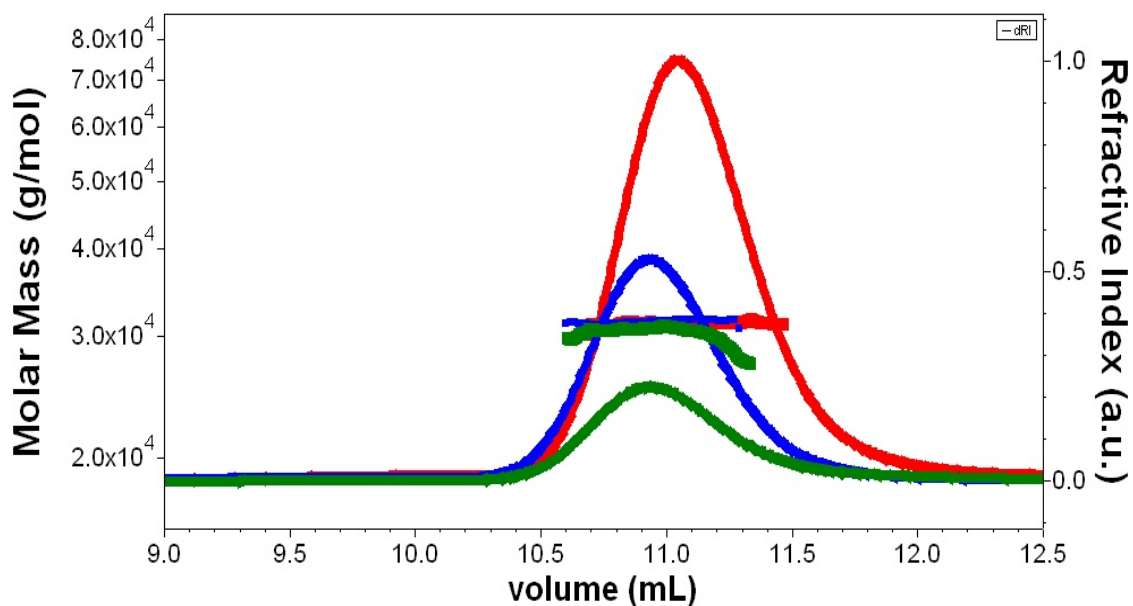

**Figure S4. SEC-MALS analysis of of c-MYC:MAX bHLHZip complex bound to DNA.**

Evaluated masses for BSA standard (grey) and MM DNA sample at 100 (red), 50 (blue) and 23  $\mu$ M (green). Masses averaged = 32.2, 32.4 and 31.1 kDa, respectively. Theoretical mass = 31.85 kDa. *The sample of c-MYC:MAX bHLHZip/DNA complex is monodisperse (single mass) at all concentrations.*

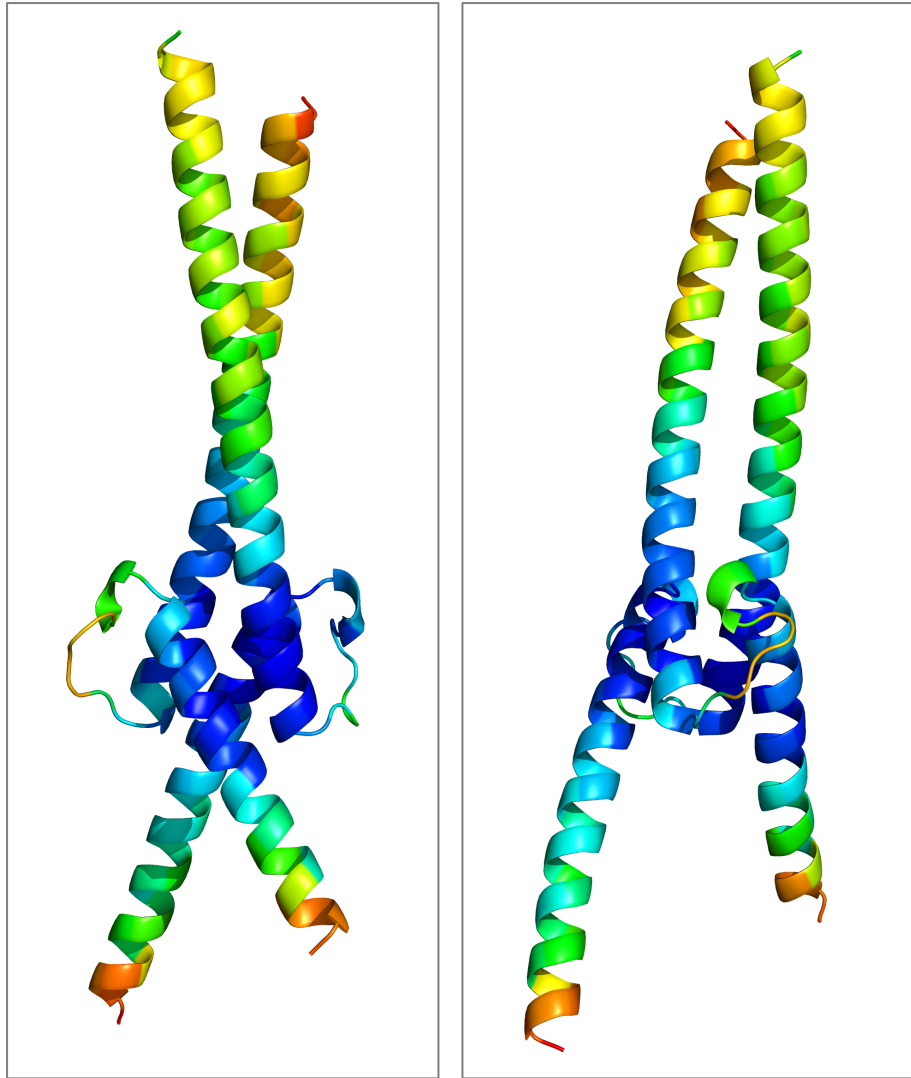

**Figure S5. Cartoon representation colour-coded according to B-factor of the c-MYC:MAX apo crystal structure (PDB entry 6G6K).**

**Left:** view of carton representation where blue is representing the lowest B-factor, red the highest. **Right:** the same view rotated by 90° degrees.

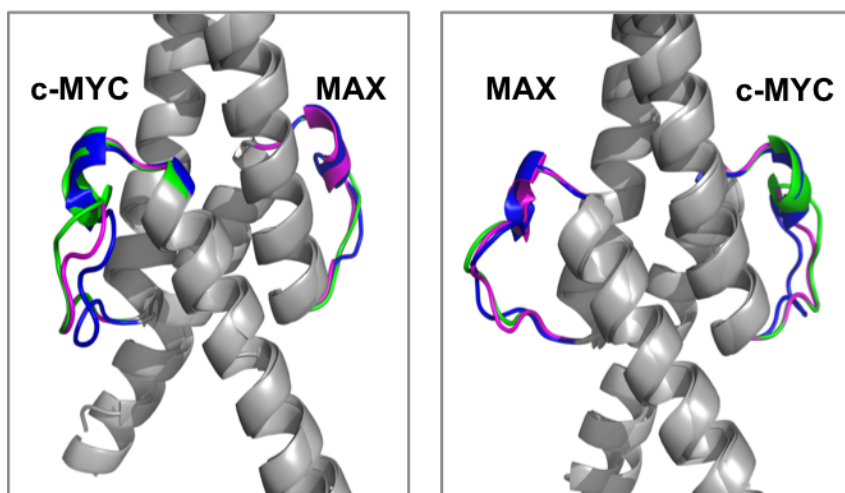

**Figure S6. Details of the Loop regions from the overlay of the cartoon representation of three crystal structures of the c-MYC:MAX apo form.**

**Left:** view of the Loop of MYC and MAX of Collect 2/6G6J (magenta), Collect 5/6G6K (blue), and Collect 7/6G6L (green). **Right:** the same view rotated by 180° degrees.
